# Supplementary material for: The RNA polymerase II subunit RPB‐9 recruits the integrator complex to terminate Caenorhabditis elegans piRNA transcription
Source: PubMed Central journal article supplement (PMC7917558; doi:10.15252/embj.2020105565), 2021-02-03
Supplement: EMBJ-40-e105565-s001.pdf [file EMBJ-40-e105565-s001.pdf]

## Table of Contents

|                                                                                    |   |
|------------------------------------------------------------------------------------|---|
| Appendix Figure S1. Inheritance of silencing .....                                 | 2 |
| Appendix Figure S2. Differential expression of genes in total RNA libraries .....  | 3 |
| Appendix Figure S3. Cross between <i>rpb-9</i> and <i>tfis</i> mutants.....        | 4 |
| Appendix Table S1. <i>C. elegans</i> strains.....                                  | 5 |
| Appendix Table S2. Genotyping primers, CRISPR repair template and guide RNAs ..... | 6 |
| Appendix Table S3. qPCR primers .....                                              | 7 |

Percentage of desilenced animals

|    | wild type |      |    |       |      | <i>rpb-9</i> |      |      |    |      | <i>hrde-1</i> |     |     |     |     | <i>prg-1; prg-2</i> |      |      |       |      |
|----|-----------|------|----|-------|------|--------------|------|------|----|------|---------------|-----|-----|-----|-----|---------------------|------|------|-------|------|
|    | r1        | r2   | r3 | r4    | r5   | r1           | r2   | r3   | r4 | r5   | r1            | r2  | r3  | r4  | r5  | r1                  | r2   | r3   | r4    | r5   |
| P0 | 0         | 0    | 0  | 0     | 0    | 0            | 0    | 0    | 0  | 0    | 0             | 0   | 0   | 0   | 0   | 0                   | 0    | 0    | 0     | 0    |
| G1 | 0         | 0    | 0  | 0     | 0    | 0            | 0    | 0    | 0  | 0    | 100           | 100 | 100 | 100 | 100 | 0                   | 0    | 0    | 0     | 0    |
| G2 | 0         | 0    | 0  | 0     | 0    | 0            | 0    | 0    | 0  | 0    | 100           | 100 | 100 | 100 | 100 | 0                   | 0    | 0    | 0     | 0    |
| G3 | 0         | 0    | 0  | 0     | 0    | 0            | 0    | 0    | 0  | 0    | 100           | 100 | 100 | 100 | 100 | 0                   | 0    | 0    | 0     | 0    |
| G4 | 0         | 0    | 0  | 0     | 0    | 0            | 0    | 0    | 0  | 0    | 100           | 100 | 100 | 100 | 100 | 0                   | 0    | 0    | 0     | 0    |
| G5 | 0         | 0    | 0  | 5.33  | 0    | 0            | 0    | 5.12 | St | 0    | 100           | 100 | 100 | 100 | 100 | 0                   | 0    | 2.34 | 0     | 0    |
| G6 | 0         | 3.23 | 0  | 10.65 | 6.75 | 9            | 8.73 | St   |    | 8.76 | 100           | 100 | 100 | 100 | 100 | 4.34                | 6.75 | 5.26 | 12.76 | 7.78 |

Appendix Figure S1. **Related to Figure 2. A)** Table of the inheritance of silencing experiment, showing the percentages of desilenced animals at each generation for individual replicates separately, for all the indicated genotypes.

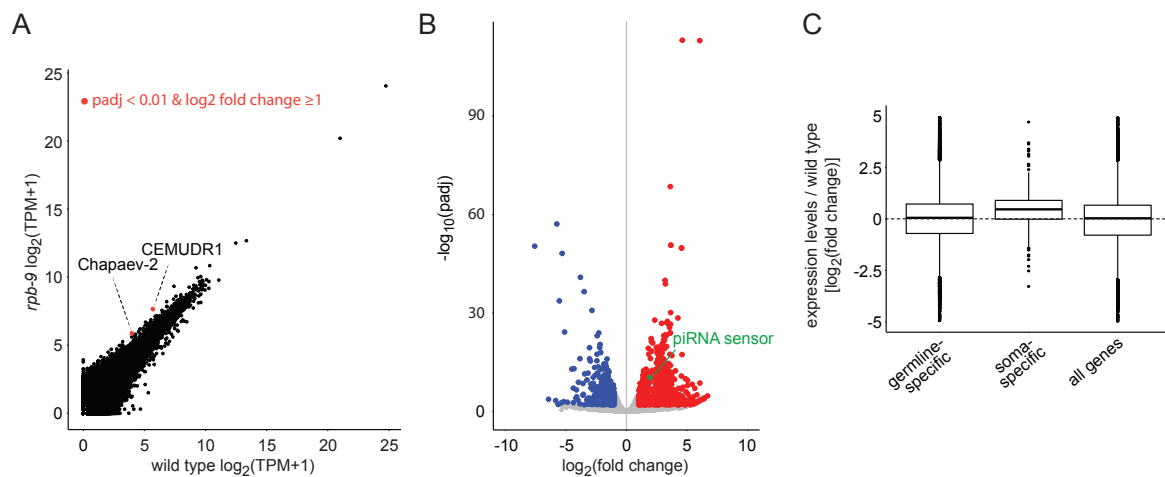

Appendix Figure S2. **Related to Figure 3.** **A)** Differential expression analysis of transposable elements in *rpb-9* (*mj261*) mutants versus wild type (total RNA “Ribo-Zero” RNA-seq libraries). **B)** Genome-wide differential expression analysis of *rpb-9* (*mj261*) mutants versus wild type (total RNA “Ribo-Zero” RNA-seq libraries). **C)** Differential expression analysis of germline-specific and soma-specific genes, as classified in (Reinke et al, 2004). All genes are shown for comparison. (Total RNA “Ribo-Zero” RNA-seq libraries).

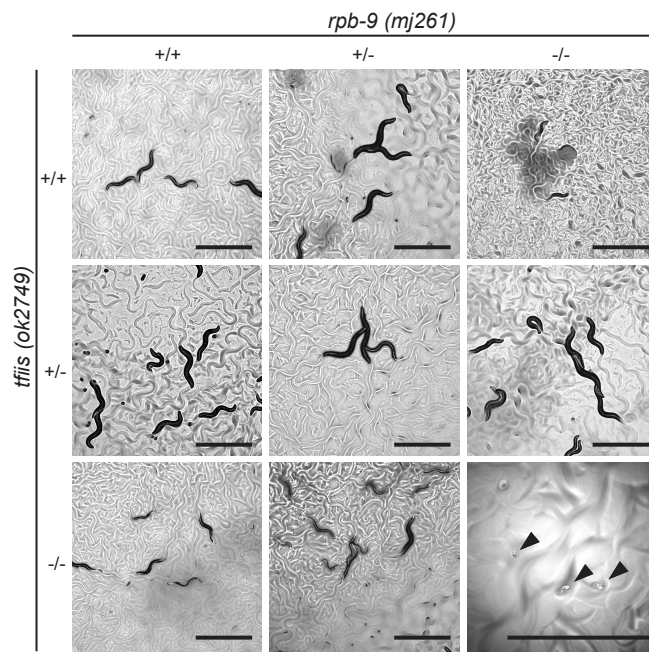

Appendix Figure S3. **Cross between *rpb-9* and *tfiis* mutants.** Representative bright light images of all the genotypes obtained from the *rpb-9 (mj261)* x *tfiis (ok2749)* cross (F3 generation). *Tfiis*; *rpb-9* double mutant embryos (indicated with black arrowheads) do not hatch. Scale bar = 1mm.

|                                                                                                                             |                                                           |
|-----------------------------------------------------------------------------------------------------------------------------|-----------------------------------------------------------|
| <i>C. elegans</i> : SX1316 – piRNA sensor ( <i>mjls144</i> )                                                                | Ashe et al., 2012                                         |
| <i>C. elegans</i> : SX1984 – <i>rpb-9</i> ( <i>mj261</i> )                                                                  | This paper                                                |
| <i>C. elegans</i> : SX3501 – ( <i>mjls31</i> ); <i>rpb-9</i> ( <i>mj261</i> )                                               | This paper                                                |
| <i>C. elegans</i> : SX2646 [rescue] – ( <i>mjSi70</i> ); <i>rpb-9</i> ( <i>mj261</i> )                                      | This paper, injections of EG6701, cross SX1984            |
| <i>C. elegans</i> : SX3031 [deficient rescue] – ( <i>mjSi89</i> ); sensor ( <i>mjls144</i> ); <i>rpb-9</i> ( <i>mj261</i> ) | This paper, injections of EG6701, cross SX1316 and SX1984 |
| <i>C. elegans</i> : VC20618 – <i>rpb-9</i> ( <i>gk357431</i> )                                                              | (Thompson et al. 2013)                                    |
| <i>C. elegans</i> : VC40196 – <i>rpb-9</i> ( <i>gk508135</i> )                                                              | (Thompson et al. 2013)                                    |
| <i>C. elegans</i> : SX3317 [ <i>rpb-9::ollas</i> ] – <i>rpb-9</i> ( <i>mj604</i> )                                          | This paper, injections N2 strain                          |
| <i>C. elegans</i> : SX2000 – <i>hrde-1</i> ( <i>tm1200</i> ); ( <i>mjls144</i> )                                            | Ashe et al., 2012                                         |
| <i>C. elegans</i> : SX1888 – <i>prg-1</i> ( <i>n4357</i> ); ( <i>mjls144</i> )                                              | Ashe et al., 2012                                         |
| <i>C. elegans</i> : FX1200 – <i>hrde-1</i> ( <i>tm1200</i> )                                                                | Buckley et al., 2012                                      |
| <i>C. elegans</i> : SX1158 – <i>prg-1</i> ( <i>n4357</i> ); ( <i>mjls144</i> ); <i>prg-2</i> ( <i>n4358</i> )               | Ashe et al., 2012                                         |
| <i>C. elegans</i> : SX3376 – sensor ( <i>mjls144</i> ); <i>rpb-9</i> ( <i>mj604</i> )                                       | This paper, cross SX3317 x SX1316                         |

Appendix Table S1. *C. elegans* strains used in this study.

|                                                                                                                                                                                                                                    |
|------------------------------------------------------------------------------------------------------------------------------------------------------------------------------------------------------------------------------------|
| <i>rpb-9 (mj261)</i> genotyping primer fwd: CCCGAAGACTGAAGAACATC                                                                                                                                                                   |
| <i>rpb-9 (mj261)</i> genotyping primer rev: TATTGGAACAGGTAGGGAACA                                                                                                                                                                  |
| <i>rpb-9::ollas (mj604)</i> genotyping primer fwd: CTGTGAGCATCGTGAAGT                                                                                                                                                              |
| <i>rpb-9::ollas (mj604)</i> genotyping primer rev:<br>AGGTAGGGAACATATGGAGA                                                                                                                                                         |
| RPB9::ollas CRISPR HR template:<br><br>GGCAGAAGAAGAGATGAGATTGTACTATGTATGTGCATCGCAAGATTGTCAGCACAGATGGACaGAAGGAGGTGGAG<br>GTGGAGCTCCGGATTCGCCAACGAGCTCGGACCACGTCTCATGGGAAAGAtaaACATAGTGTCCAATTGTTTCTATTT<br>ATTTGAAACGTTTTCTTAATCGTC |
| RPB-9::ollas CRISPR gRNA: CGCAAGAUUGUCAGCACAGA                                                                                                                                                                                     |
| dpy-10 CRISPR gRNA:<br>GCUACCAUAGGCACCACGAG                                                                                                                                                                                        |

Appendix Table S2. Genotyping primers, CRISPR repair template and guide RNAs used in this study.

|                                                           |
|-----------------------------------------------------------|
| <i>Spliced gfp</i> ex1 fwd: GTGAAGGTGATGCAACATACGG        |
| <i>Spliced gfp</i> ex1-ex2 rev: ACAAGTGTGGCCATGGAAC       |
| <i>Unspliced gfp</i> ex1 fwd: AACATACGGAAAACCTACCCTTA     |
| <i>Unspliced gfp</i> ex2-in1 rev: CAAGTGTGGCTGAAAATTTAAA  |
| <i>Unspliced gfp</i> ex2-in2 fwd: TGACGGGAACTACAAGACACG   |
| <i>Unspliced gfp</i> ex3-in2 rev: TCAAACCTGACTTCAGCACCTG  |
| <i>Unspliced gfp</i> ex3 fwd: ACAATGTATACATCATGGCAGAC     |
| <i>Unspliced gfp</i> ex4-in3 rev: CTAATTTTGAAGTTCTGAAAATT |
| <i>cdc-42</i> for: CTGCTGGACAGGAAGATTACG                  |
| <i>cdc-42</i> rev: CTCGGACATTCTCGAATGAAG                  |

Appendix Table S3. qPCR primers used in this study.
