# Supplementary material for: The RNA polymerase II subunit RPB‐9 recruits the integrator complex to terminate Caenorhabditis elegans piRNA transcription
Source: PubMed Central journal article supplement (PMC7917558; doi:10.15252/embj.2020105565), 2021-02-03
Supplement: EMBJ-40-e105565-s003.pdf [file EMBJ-40-e105565-s003.pdf]

.....

.....

.....
